# Supplementary material for: Endophytic Burkholderia sp. SSG as a potential biofertilizer promoting boxwood growth
Source: PeerJ journal article supplement (doi:10.7717/peerj.9547), 2020-07-16
Supplement: raw_data-SAS.pdf [file raw_data-SAS.pdf]

# The SAS System

## The ANOVA Procedure

| Class Level Information |        |          |
|-------------------------|--------|----------|
| Class                   | Levels | Values   |
| cv                      | 3      | BD JB WG |
| treat                   | 2      | dH2O SSG |
| exp                     | 3      | I II III |

|                             |    |
|-----------------------------|----|
| Number of Observations Read | 54 |
| Number of Observations Used | 54 |

### Dependent Variables: w (g/mon)

| Source          | DF | Sum of Squares | Mean Square | F Value | Pr > F |
|-----------------|----|----------------|-------------|---------|--------|
| Model           | 13 | 344.1074282    | 26.4698022  | 4.49    | 0.0001 |
| Error           | 40 | 235.5597737    | 5.8889943   |         |        |
| Corrected Total | 53 | 579.6672019    |             |         |        |

|          |           |          |          |
|----------|-----------|----------|----------|
| R-Square | Coeff Var | Root MSE | w Mean   |
| 0.593629 | 62.52775  | 2.426725 | 3.881037 |

| Source    | DF | Anova SS    | Mean Square | F Value | Pr > F  |
|-----------|----|-------------|-------------|---------|---------|
| cv        | 2  | 149.3295676 | 74.6647838  | 12.68   | < .0001 |
| treat     | 1  | 110.3445345 | 110.3445345 | 18.74   | < .0001 |
| exp       | 2  | 4.4026089   | 2.2013045   | 0.37    | 0.6905  |
| cv*treat  | 2  | 18.9892196  | 9.4946098   | 1.61    | 0.2121  |
| cv*exp    | 4  | 43.7954224  | 10.9488556  | 1.86    | 0.1366  |
| treat*exp | 2  | 17.2460751  | 8.6230376   | 1.46    | 0.2434  |

# The SAS System

## The ANOVA Procedure

cv=BD

| Class Level Information |        |          |
|-------------------------|--------|----------|
| Class                   | Levels | Values   |
| treat                   | 2      | dH2O SSG |

|                             |    |
|-----------------------------|----|
| Number of Observations Read | 18 |
| Number of Observations Used | 18 |

Dependent Variables: w (g/mon)

| Source          | DF | Sum of Squares | Mean Square | F Value | Pr > F |
|-----------------|----|----------------|-------------|---------|--------|
| Model           | 1  | 92.5389427     | 92.5389427  | 6.26    | 0.0236 |
| Error           | 16 | 236.6016442    | 14.7876028  |         |        |
| Corrected Total | 17 | 329.1405869    |             |         |        |

|          |           |          |          |
|----------|-----------|----------|----------|
| R-Square | Coeff Var | Root MSE | w Mean   |
| 0.281153 | 69.77870  | 3.845465 | 5.510944 |

| Source | DF | Anova SS    | Mean Square | F Value | Pr > F |
|--------|----|-------------|-------------|---------|--------|
| treat  | 1  | 92.53894272 | 92.53894272 | 6.26    | 0.0236 |

t Tests (LSD) for w

Note: This test controls the Type I comparisonwise error rate, not the experimentwise error rate.

|                              |         |
|------------------------------|---------|
| Alpha                        | 0.05    |
| Error Degrees of Freedom     | 16      |
| Error Mean Square            | 14.7876 |
| Critical Value of t          | 2.11991 |
| Least Significant Difference | 3.8429  |

Means with the same letter  
are not significantly different.

| t Grouping | Mean  | N | treat |
|------------|-------|---|-------|
| A          | 7.778 | 9 | SSG   |
| B          | 3.244 | 9 | dH2O  |

# The SAS System

## The ANOVA Procedure

cv=JB

| Class Level Information |        |          |
|-------------------------|--------|----------|
| Class                   | Levels | Values   |
| treat                   | 2      | dH2O SSG |

|                             |    |
|-----------------------------|----|
| Number of Observations Read | 18 |
| Number of Observations Used | 18 |

Dependent Variable: w(g/m<sup>on</sup>)

| Source          | DF | Sum of Squares | Mean Square | F Value | Pr > F |
|-----------------|----|----------------|-------------|---------|--------|
| Model           | 1  | 17.29896200    | 17.29896200 | 14.92   | 0.0014 |
| Error           | 16 | 18.54956778    | 1.15934799  |         |        |
| Corrected Total | 17 | 35.84852978    |             |         |        |

|          |           |          |          |
|----------|-----------|----------|----------|
| R-Square | Coeff Var | Root MSE | w Mean   |
| 0.482557 | 67.38455  | 1.076730 | 1.597889 |

| Source | DF | Anova SS    | Mean Square | F Value | Pr > F |
|--------|----|-------------|-------------|---------|--------|
| treat  | 1  | 17.29896200 | 17.29896200 | 14.92   | 0.0014 |

t Tests (LSD) for w

Note: This test controls the Type I comparisonwise error rate, not the experimentwise error rate.

|                              |          |
|------------------------------|----------|
| Alpha                        | 0.05     |
| Error Degrees of Freedom     | 16       |
| Error Mean Square            | 1.159348 |
| Critical Value of t          | 2.11991  |
| Least Significant Difference | 1.076    |

Means with the same letter  
are not significantly different.

| t Grouping | Mean   | N | treat |
|------------|--------|---|-------|
| A          | 2.5782 | 9 | SSG   |
| B          | 0.6176 | 9 | dH2O  |

# The SAS System

## The ANOVA Procedure

cv=WG

| Class Level Information |        |          |
|-------------------------|--------|----------|
| Class                   | Levels | Values   |
| treat                   | 2      | dH2O SSG |

|                             |    |
|-----------------------------|----|
| Number of Observations Read | 18 |
| Number of Observations Used | 18 |

Dependent Variable: w(g/mon)

| Source          | DF | Sum of Squares | Mean Square | F Value | Pr > F |
|-----------------|----|----------------|-------------|---------|--------|
| Model           | 1  | 19.49584939    | 19.49584939 | 6.80    | 0.0190 |
| Error           | 16 | 45.85266822    | 2.86579176  |         |        |
| Corrected Total | 17 | 65.34851761    |             |         |        |

|          |           |          |          |
|----------|-----------|----------|----------|
| R-Square | Coeff Var | Root MSE | w Mean   |
| 0.298337 | 37.33483  | 1.692865 | 4.534278 |

| Source | DF | Anova SS    | Mean Square | F Value | Pr > F |
|--------|----|-------------|-------------|---------|--------|
| treat  | 1  | 19.49584939 | 19.49584939 | 6.80    | 0.0190 |

t Tests (LSD) for w

Note: This test controls the Type I comparisonwise error rate, not the experimentwise error rate.

|                              |          |
|------------------------------|----------|
| Alpha                        | 0.05     |
| Error Degrees of Freedom     | 16       |
| Error Mean Square            | 2.865792 |
| Critical Value of t          | 2.11991  |
| Least Significant Difference | 1.6917   |

Means with the same letter  
are not significantly different.

| tGrouping | Mean   | N | treat |
|-----------|--------|---|-------|
| A         | 5.5750 | 9 | SSG   |
| B         | 3.4936 | 9 | dH2O  |

### The SAS System w(g/mon)

| O b s | cv | treat | mW      | seW     |
|-------|----|-------|---------|---------|
| 1     | BD | dH2O  | 3.24356 | 0.51128 |
| 2     | BD | SSG   | 7.77833 | 1.73918 |
| 3     | JB | dH2O  | 0.61756 | 0.25449 |
| 4     | JB | SSG   | 2.57822 | 0.43917 |
| 5     | WG | dH2O  | 3.49356 | 0.46230 |
| 6     | WG | SSG   | 5.57500 | 0.65048 |
