# Supplementary material for: Endophytic Burkholderia sp. SSG as a potential biofertilizer promoting boxwood growth
Source: PeerJ. 2020 Jul 16;8:e9547. doi: 10.7717/peerj.9547 (PMC7369026; doi:10.7717/peerj.9547)
Supplement: Supplemental Information 1 [file peerj-08-9547-s001.xlsx]

## Sheet: raw data
Expt	Treatment	Rep	Variety	Pre-weight	Post-weight	Difference	Note
I	SSG	1	JB	142.2	148.98	4.55095	JB=Justin Brouwers
I	SSG	2	JB	111.8	117.8	5.09338
I	SSG	3	JB	171.4	191.48	10.4867
I	dH2O	1	JB	152.9	160.43	4.69364
I	dH2O	2	JB	104.3	110.3	5.43971
I	dH2O	3	JB	171.5	169.82	-0.989283
II	SSG	1	JB	205.9	243.96	15.6009
II	SSG	2	JB	161.1	201.52	20.0576
II	SSG	3	JB	127.4	167.5	23.9403
II	dH2O	1	JB	202.8	199.28	-1.76636
II	dH2O	2	JB	178.1	191.7	7.09442
II	dH2O	3	JB	117.8	126.3	6.73001
III	SSG	1	JB	83.5	113.7	26.5611
III	SSG	2	JB	97.6	120.2	18.802
III	SSG	3	JB	134.6	162.4	17.1182
III	dH2O	1	JB	84.9	105.7	19.6783
III	dH2O	2	JB	89.1	92.35	3.51922
III	dH2O	3	JB	127.2	128.3	0.857366
I	SSG	1	BD	113.9	279.7	59.2778	BD= Buddy
I	SSG	2	BD	134.2	163.34	17.8401
I	SSG	3	BD	132.5	295.3	55.1304
I	dH2O	1	BD	119.3	148.94	19.9006
I	dH2O	2	BD	133.7	148.74	10.1116
I	dH2O	3	BD	132.8	148.34	10.4759
II	SSG	1	BD	149.3	222.5	32.8989
II	SSG	2	BD	107	147.57	27.492
II	SSG	3	BD	123.1	161.75	23.8949
II	dH2O	1	BD	155.3	211.5	26.5721
II	dH2O	2	BD	85.5	110.1	22.3433
II	dH2O	3	BD	134	172.3	22.2287
III	SSG	1	BD	92.5	139.1	33.5011
III	SSG	2	BD	98.9	185.58	46.7076
III	SSG	3	BD	82.5	139.11	40.6944
III	dH2O	1	BD	82.7	103	19.7087
III	dH2O	2	BD	105.6	158.9	33.5431
III	dH2O	3	BD	67	106	36.7925
I	SSG	1	WG	47.1	87.32	46.0605	WG= Winter Gem
I	SSG	2	WG	49.1	100.03	50.9147
I	SSG	3	WG	68.5	119.91	42.8738
I	dH2O	1	WG	42.6	81.55	47.7621
I	dH2O	2	WG	49.2	70.56	30.2721
I	dH2O	3	WG	67.5	76.1	11.3009
II	SSG	1	WG	33.2	72.66	54.3077
II	SSG	2	WG	28.2	64.32	56.1567
II	SSG	3	WG	31.1	83.55	62.7768
II	dH2O	1	WG	91.5	137.06	33.2409
II	dH2O	2	WG	39.7	68.65	42.1704
II	dH2O	3	WG	30	70.31	57.3318
III	SSG	1	WG	69.8	158.02	55.8284
III	SSG	2	WG	46.4	101.24	54.1683
III	SSG	3	WG	59.3	147.4	59.7693
III	dH2O	1	WG	59.3	115.46	48.6402
III	dH2O	2	WG	35.6	71.15	49.9649
III	dH2O	3	WG	58.1	97.08	40.1525
